# Supplementary material for: Field-induced slow relaxation of magnetization in a tetrahedral Co(ii) complex with easy plane anisotropy
Source: Royal Society of Chemistry journal article supplement (doi:10.1039/c3dt51801a), 2013-01-01
Supplement: c3dt51801a.pdf [file c3dt51801a.pdf]

*Supporting Information for*

**Field-Induced Slow Relaxation of Magnetization in a  
Tetrahedral Co(II) Complex With Easy Plane Anisotropy**

Wei Huang, Tao Liu, Dayu Wu, Jiajun Cheng, Z.W. Ouyang and Chunying Duan

Table S1. The parameters of  $\chi_T$ ,  $\chi_S$ ,  $\tau_0$ , and  $\alpha$  used in the analyses by Debye model for complex **dmpHCoBr** under 1000 Oe applied dc field.

| Temperature | $\chi_S(\text{cm}^3 \text{mol}^{-1})$ | $\chi_T(\text{cm}^3 \text{mol}^{-1})$ | $\tau_0$ (s) | $\alpha$ |
|-------------|---------------------------------------|---------------------------------------|--------------|----------|
| 1.8 K       | 1.258                                 | 1.69246                               | 0.00083      | 0.113    |
| 2.0 K       | 1.249                                 | 1.702                                 | 0.00065      | 0.097    |
| 2.2 K       | 1.244                                 | 1.708                                 | 0.00049      | 0.0857   |
| 2.4 K       | 1.245                                 | 1.710                                 | 0.00030      | 0.0838   |
| 2.6 K       | 1.240                                 | 1.715                                 | 0.00015      | 0.102    |
| 2.8 K       | 1.158                                 | 1.799                                 | 0.00005      | 0.17466  |

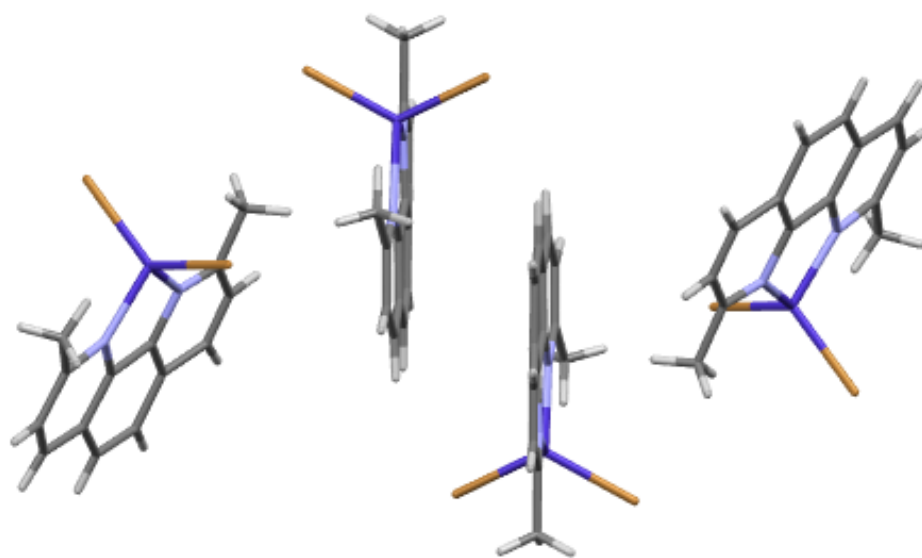

Figure S1. Crystal packing diagram of complex **dmphCoBr** emphasizing the  $\pi \dots \pi$  and C-H... $\pi$  interactions.

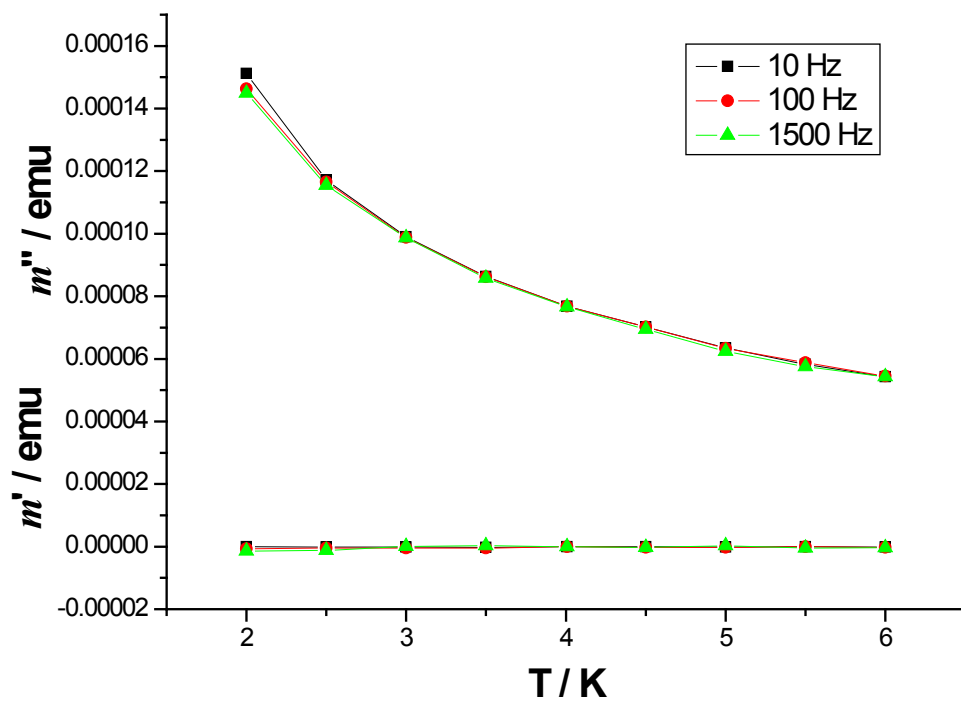

**Figure S2.** Temperature-dependent ac susceptibility data for complex **dmphCoBr** at three frequencies under 0 Oe dc field.

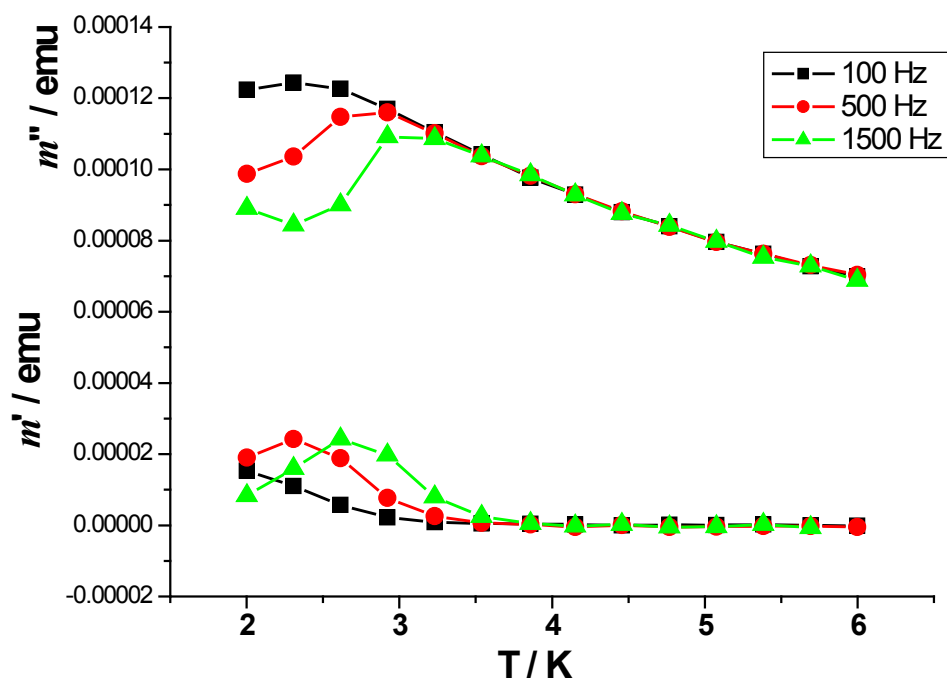

**Figure S3.** Temperature-dependent *ac* susceptibility data for complex **dmphCoBr** at three frequencies under 1000 Oe dc field.

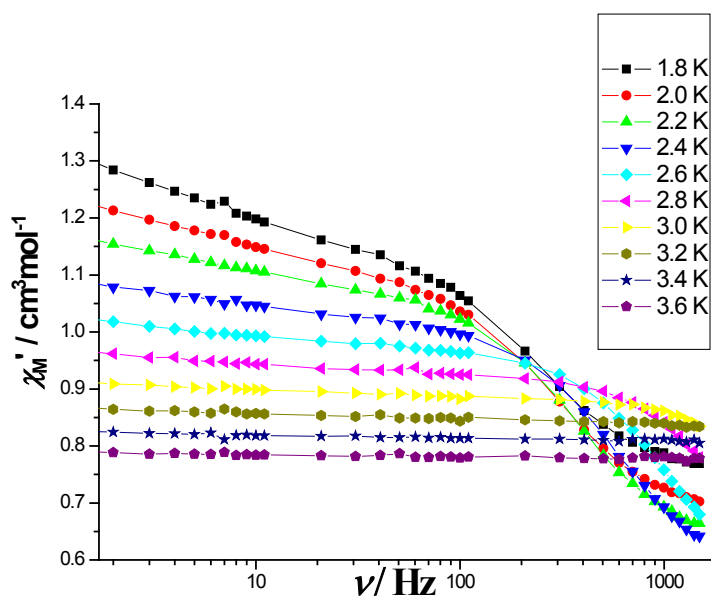

**Figure S4.** Frequency dependence of  $\chi_M'$  under 1000 Oe applied dc field strengths for **dmphCoBr** at different temperature. Solid lines are guides for the eye.

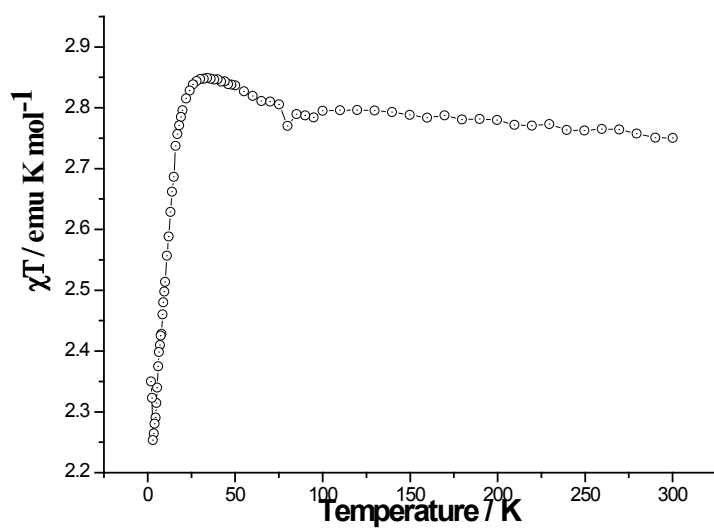

Figure S5. Temperature dependence of the  $\chi_M T$  product at 2500 Oe for complex **dmpHCo<sub>0.2</sub>Zn<sub>0.8</sub>Br** (with  $\chi$  being the molar susceptibility per mononuclear complex defined as M/H).

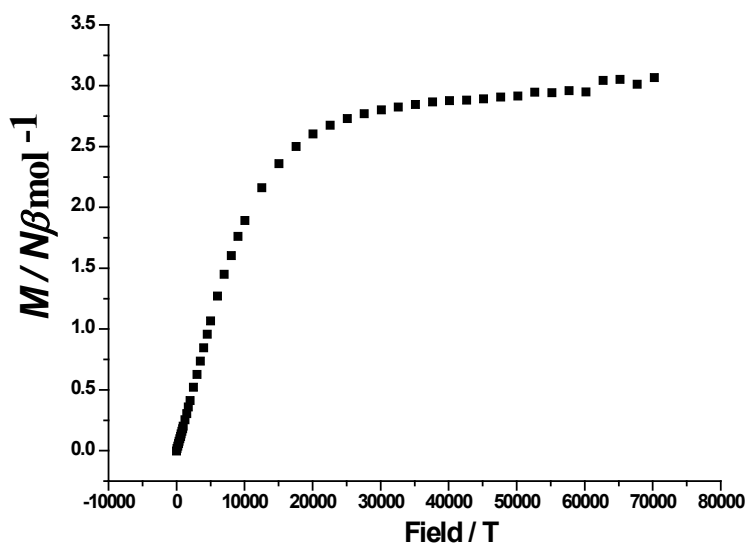

Figure S6. Magnetization versus magnetic field for **dmphCo<sub>0.2</sub>Zn<sub>0.8</sub>Br** at 2 K.



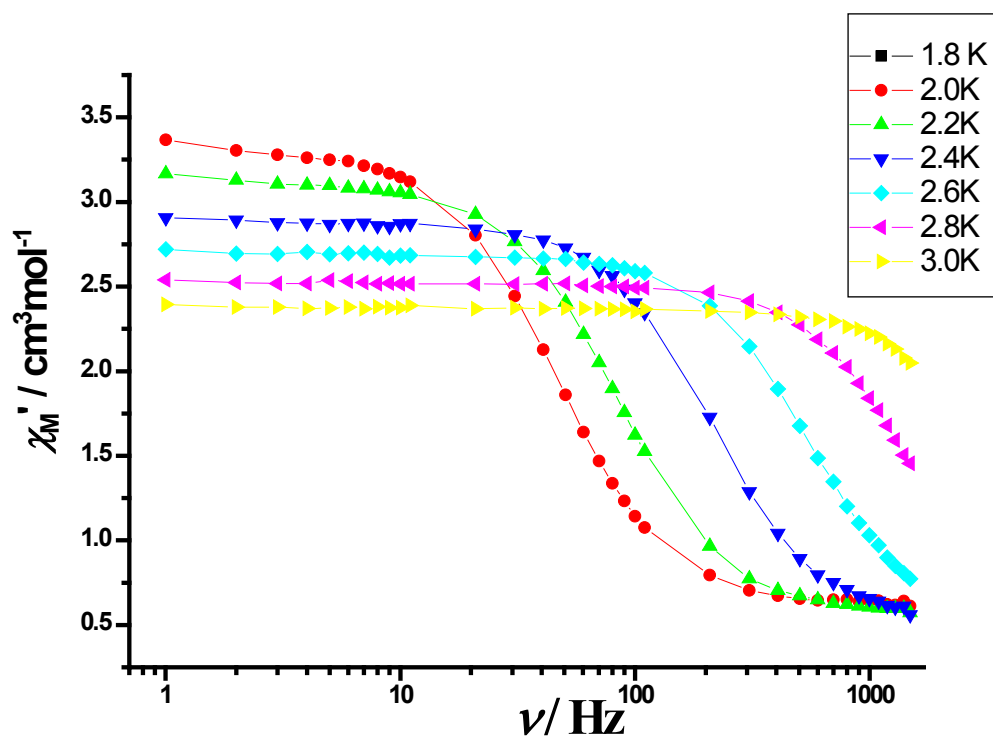

Figure S7. Variable-temperature frequency-dependent in-phase ac magnetic susceptibility data obtained for diluted **dmphCoBr** in a 1000 Oe dc field.
